# Supplementary material
Source: publisher site journal article supplement (https://www.dovepress.com/article/273746)
Supplement: Supplementary file 1 [file get_supplementary_file.php]

## Appendix

### Focus Group Guide

**Method:** The facilitator will use follow-up questioning during the focus group. The questions in this guide serve to spark conversation and drive discussion. Questions may be modified to accommodate the unique roles and responsibilities of participants.

**Participants:** Participants in the interprofessional team huddle, including residents and nurses.

**Introduction to participants:** Thank you for agreeing to participate in a discussion around interprofessional team communication. We will not use an audio recording device to record this interview. A note-taker is present to transcribe our discussion. In our analysis of feedback, you will not be identified by name—all participants will be identified by category—nurse or resident. Thank you for your time.

### Questions

1. Describe the process that drove the huddle? What actually happened during the huddle?
2. How did the physical environment help make the huddle successful? What made it challenging?
3. If a new resident/nurse joined the team, how would you train them to participate in the huddle?
4. How did the unit get team-members to participate in the huddle?
5. Did the huddle require you to think earlier? (e.g., communicate with the attending beforehand, etc.)
6. Do you think the huddle was successful? If so, what would you describe as the essential elements that made the huddle work? If not, why?
7. What do you think your group was trying to accomplish with the huddle?
8. What was your role in working toward this accomplishment? What do you believe you were expected to do?
9. What was the nurses/residents' role in the huddle? What did you expect the nurses/residents to do? How did you know you met those expectations?
10. Were you ever pulled away from the huddle or unable to attend? If so, describe. What did you observe when nurses/residents were pulled away from the huddle—how did the huddle continue?
11. Do you feel the huddle supported/promoted a high-performing team?
12. Did you ever adjust your patient-care strategy based on feedback from the huddle? If so, please share an example.
13. In what ways did you and your patients benefit and/or suffer from the huddle?
14. Describe the huddle's impact on patient care?
